# Supplementary material for: Impact of 3D radiative transfer on airborne NO 2 imaging remote sensing over cities with buildings
Source: Copernicus journal article supplement (doi:10.5194/amt-14-6469-2021), 2021-10-08
Supplement: Supplementary file 2 [file amt-14-6469-2021-supplement.zip]

Archive with 4 entries (4 files):
- amt-2021-129-supplement-version2.pdf
- amt-14-6469-2021-supplement-title-page.pdf
- README_shp2nctriangle.md
- shp2nctriangle.py
