# Supplementary material for: Impact of 3D radiative transfer on airborne NO 2 imaging remote sensing over cities with buildings
Source: Copernicus journal article supplement (doi:10.5194/amt-14-6469-2021), 2021-10-08
Supplement: Supplementary file 2 [file amt-14-6469-2021-supplement.zip › amt-14-6469-2021-supplement-title-page.pdf]

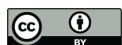

*Supplement of*

## **Impact of 3D radiative transfer on airborne NO<sub>2</sub> imaging remote sensing over cities with buildings**

**Marc Schwaerzel et al.**

*Correspondence to:* Gerrit Kuhlmann ([gerrit.kuhlmann@empa.ch](mailto:gerrit.kuhlmann@empa.ch))

- [amt-14-6469-2021-supplement-title-page.pdf](#)
- [README\\_shp2nctriangle.md](#)
- [amt-2021-129-supplement-version2.pdf](#)
- [shp2nctriangle.py](#)

The copyright of individual parts of the supplement might differ from the article licence.
