# Supplementary material for: Impact of 3D radiative transfer on airborne NO 2 imaging remote sensing over cities with buildings
Source: Copernicus journal article supplement (doi:10.5194/amt-14-6469-2021), 2021-10-08
Supplement: Supplementary file 2 [file amt-14-6469-2021-supplement.zip › README_shp2nctriangle.md]

#!/usr/bin/env python3
# -*- coding: utf-8 -*-
"""
Created on Tue Sep 21 11:25:19 2021

@author: Marc Schwaerzel
Code published with the AMT publication Schwaerzel et al., 2021 
"""
# Read me file for the shp2nctriangle code
# Code to create triangles from polygons from a shape file and output it as a netCDF readable by MYSTIC
## inputs description
i1 = "input_path"   -> [string] the path for the shp input file
i2 = "saving_path"  -> [string] the path where to save the output nc file
i3 = "name"         -> [string] name of the file to save
i4 = coord_x_min    -> [float/integer] x coordinate of the lower left corner of your domain
i5 = coord_y_min    -> [float/integer] y coordinate of the lower left corner of your domain 
i6 = dx             -> [float/integer]
i7 = dy             -> [float/integer]
i8 = alb_roof       -> [float/integer] albedo of the roofs
i9 = alb_wall       -> [float/integer] albedo of the walls
i10 = alb_ground    -> [float/integer] alebdo of the ground 
i11 = alb_grav      -> [float/integer] albedo of concrete/gravel

## example: code use
$ python3 shp2nctriangle.py i1 i2 i3 i4 i5 i6 i7 i8 i9 i10 i11
